# Supplementary material for: Structural Characterization of Glycerol Kinase from the Thermophilic Fungus Chaetomium thermophilum
Source: MDPI journal article supplement (doi:10.3390/ijms21249570), 2020-12-16
Supplement: s1 [file s1]

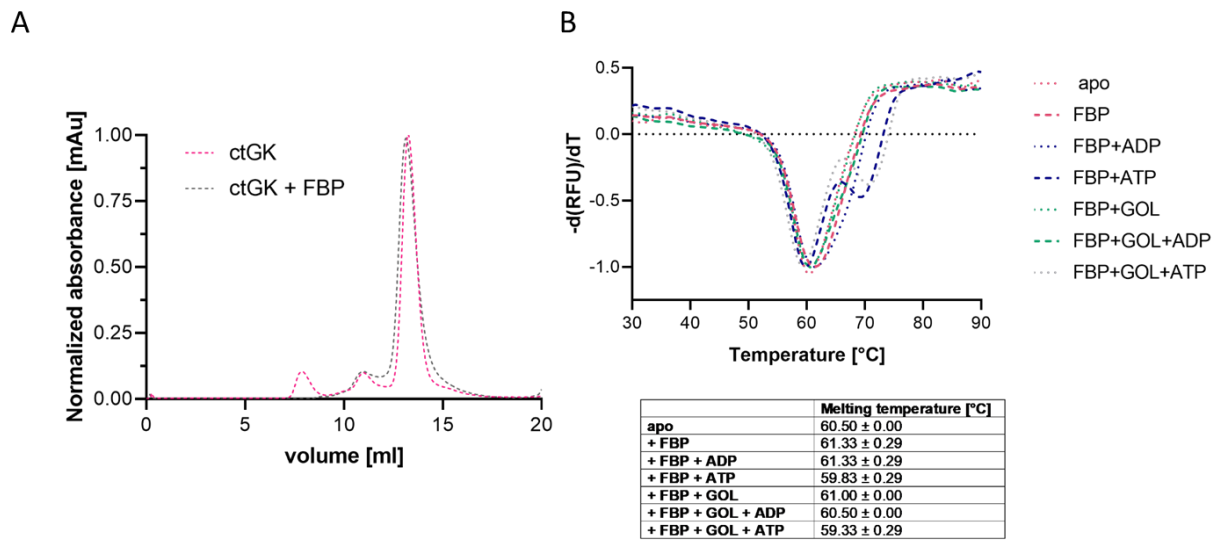

**Figure S1. Influence of fructose 1,6-bis-phosphate (FBP) on ctGK oligomerization and stability. A.** Size-exclusion profiles of ctGK with and without FBP. **B.** Thermal shift assay of ctGK in the presence of FBP and different substrates.

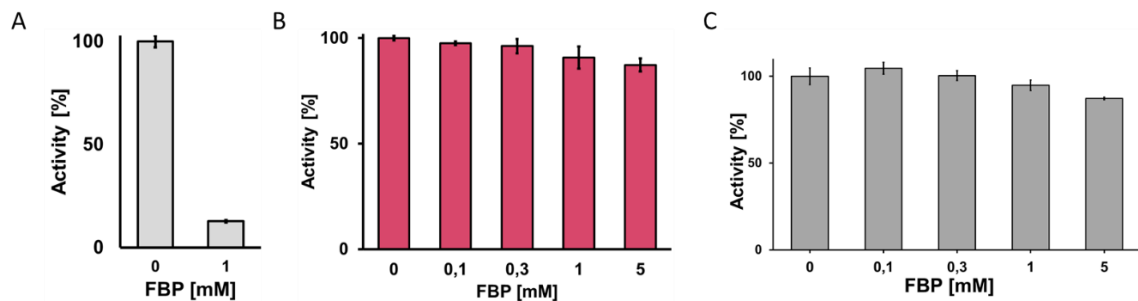

**Figure S2. Fructose 1,6-bis-phosphate does not inhibit ctGK. A.** Inhibition of mjADPGK/PFK by FBP. **B.** Inhibition of ctGK activity in the presence of FBP. **C.** phADPGK activity in the presence of FBP.

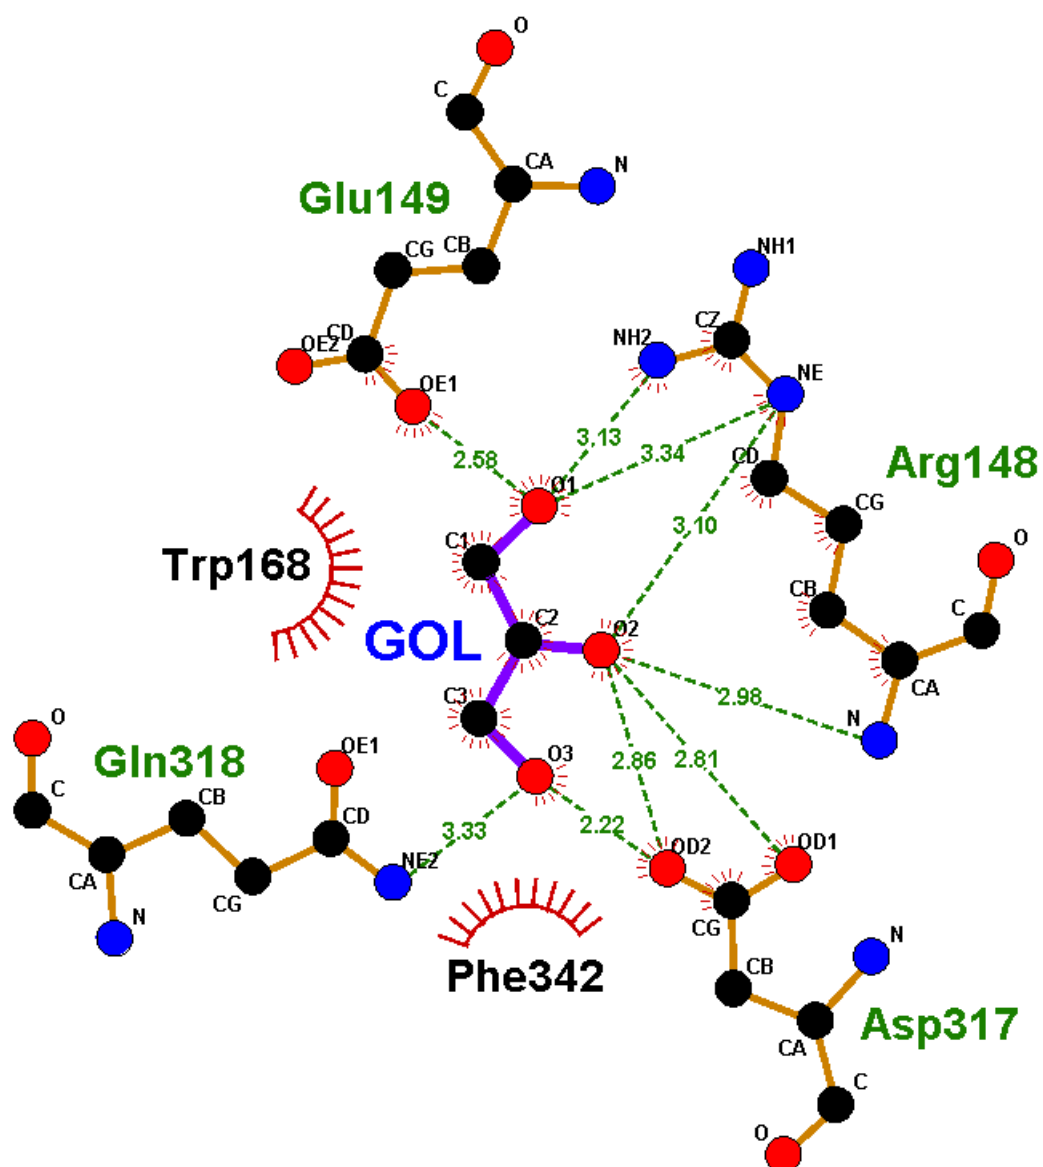

**Figure S3.** Ligplot showing the protein-glycerol interactions, based on energy score (hydrogen bonding and hydrophobic), generated by Ligplot program.

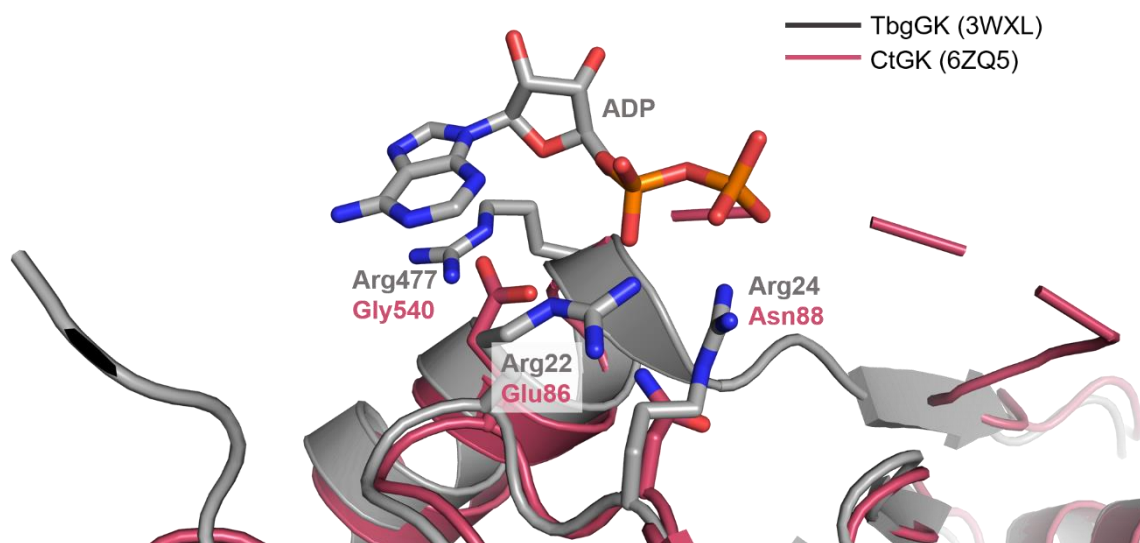

Figure S4. Superposition of CtGK (dark pink) and TbgGK (grey) secondary nucleotide-binding site.

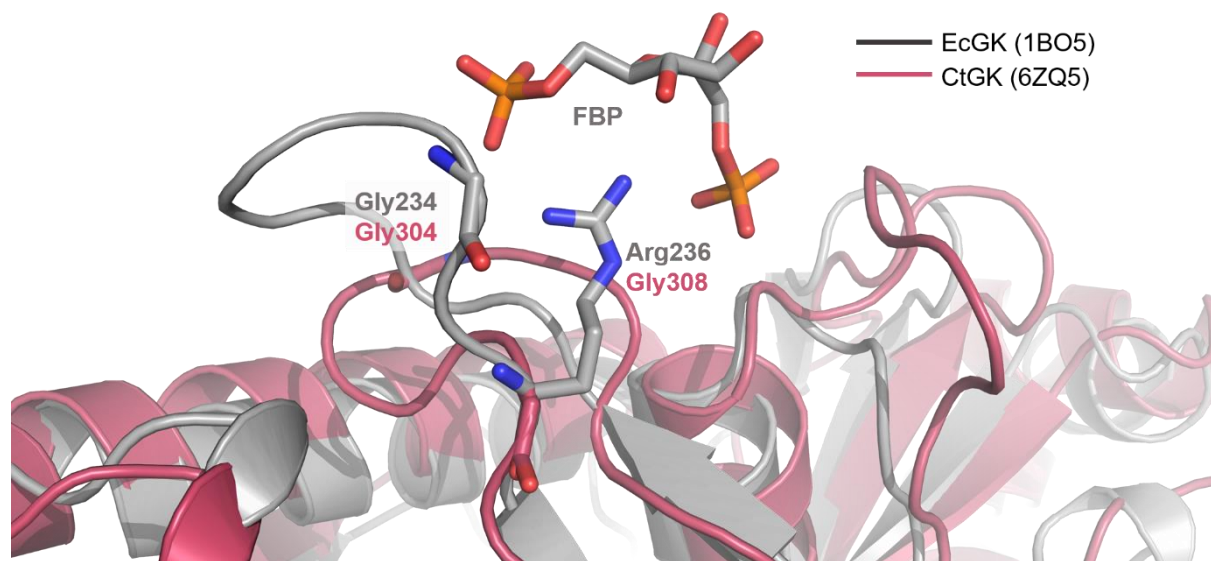

Figure S5. Superposition of ctGK (dark pink) and EcGK (grey) FBP binding site.

**Table S1.** Mutual differences between CtGK monomers expressed as main chain RMSD [Å] for (A) full chain, (B) N-terminal domain, (C) C-terminal domain. Values obtained using Cealign in PyMol. In bold are highlighted complexes containing GOL in the active site.

**A**

| Model | Chain | 6ZQ4 |       |       |       |       |       |       |       | 6ZQ5  |       | 6ZQ6  |       |       |       | 6ZQ7  | 6ZQ8  |       |
|-------|-------|------|-------|-------|-------|-------|-------|-------|-------|-------|-------|-------|-------|-------|-------|-------|-------|-------|
|       |       | A    | B     | C     | D     | E     | F     | G     | H     | A     | B     | A     | B     | C     | D     | A     | A     | B     |
| 6ZQ4  | A     |      | 0,736 | 0,313 | 0,279 | 0,302 | 0,312 | 0,217 | 0,276 | 0,375 | 0,442 | 0,371 | 0,688 | 0,331 | 0,336 | 1,030 | 1,762 | 0,570 |
|       | B     |      |       | 0,811 | 0,321 | 0,331 | 0,287 | 0,366 | 0,365 | 0,816 | 0,861 | 0,860 | 0,488 | 0,373 | 0,337 | 0,845 | 1,721 | 0,543 |
|       | C     |      |       |       | 0,791 | 0,271 | 0,328 | 0,228 | 0,472 | 0,367 | 0,560 | 0,382 | 0,629 | 0,824 | 0,825 | 1,193 | 2,042 | 0,554 |
|       | D     |      |       |       |       | 0,177 | 0,219 | 0,251 | 0,389 | 0,360 | 0,513 | 0,449 | 0,388 | 0,396 | 0,395 | 1,039 | 1,937 | 0,572 |
|       | E     |      |       |       |       |       | 0,246 | 0,268 | 0,412 | 0,352 | 0,528 | 0,469 | 0,429 | 0,411 | 0,418 | 1,001 | 1,920 | 0,595 |
|       | F     |      |       |       |       |       |       | 0,286 | 0,361 | 0,390 | 0,480 | 0,454 | 0,431 | 0,371 | 0,363 | 0,935 | 1,843 | 0,590 |
|       | G     |      |       |       |       |       |       |       | 0,345 | 0,342 | 0,477 | 0,353 | 0,373 | 0,317 | 0,346 | 0,903 | 1,848 | 0,581 |
|       | H     |      |       |       |       |       |       |       |       | 0,467 | 0,352 | 0,476 | 0,560 | 0,440 | 0,388 | 0,720 | 1,553 | 0,574 |
| 6ZQ5  | A     |      |       |       |       |       |       |       |       |       | 0,447 | 0,507 | 0,709 | 0,469 | 0,497 | 1,177 | 1,918 | 0,653 |
|       | B     |      |       |       |       |       |       |       |       |       |       | 0,545 | 0,870 | 0,554 | 0,531 | 1,010 | 1,507 | 0,632 |
| 6ZQ6  | A     |      |       |       |       |       |       |       |       |       |       |       | 0,691 | 0,243 | 0,275 | 1,025 | 1,747 | 0,488 |
|       | B     |      |       |       |       |       |       |       |       |       |       |       |       | 0,332 | 0,355 | 0,987 | 1,881 | 0,556 |
|       | C     |      |       |       |       |       |       |       |       |       |       |       |       |       | 0,182 | 0,812 | 1,713 | 0,452 |
|       | D     |      |       |       |       |       |       |       |       |       |       |       |       |       |       | 0,757 | 1,675 | 0,467 |
| 6ZQ7  | A     |      |       |       |       |       |       |       |       |       |       |       |       |       |       |       | 1,183 | 0,813 |
| 6ZQ8  | A     |      |       |       |       |       |       |       |       |       |       |       |       |       |       |       |       | 1,533 |
|       | B     |      |       |       |       |       |       |       |       |       |       |       |       |       |       |       |       |       |

**B**

| Model | Chain | 6ZQ4 |       |       |       |       |       |       |       | 6ZQ5  |       | 6ZQ6  |       |       |       | 6ZQ7  | 6ZQ8  |       |
|-------|-------|------|-------|-------|-------|-------|-------|-------|-------|-------|-------|-------|-------|-------|-------|-------|-------|-------|
|       |       | A    | B     | C     | D     | E     | F     | G     | H     | A     | B     | A     | B     | C     | D     | A     | A     | B     |
| 6ZQ4  | A     |      | 0,189 | 0,193 | 0,174 | 0,218 | 0,218 | 0,186 | 0,230 | 0,319 | 0,371 | 0,228 | 0,214 | 0,199 | 0,217 | 0,423 | 0,714 | 0,394 |
|       | B     |      |       | 0,204 | 0,175 | 0,216 | 0,193 | 0,213 | 0,241 | 0,329 | 0,374 | 0,244 | 0,226 | 0,222 | 0,221 | 0,436 | 0,714 | 0,389 |
|       | C     |      |       |       | 0,176 | 0,204 | 0,201 | 0,175 | 0,241 | 0,304 | 0,358 | 0,212 | 0,216 | 0,203 | 0,229 | 0,403 | 0,692 | 0,357 |
|       | D     |      |       |       |       | 0,192 | 0,181 | 0,196 | 0,219 | 0,329 | 0,361 | 0,229 | 0,217 | 0,219 | 0,219 | 0,419 | 0,712 | 0,380 |
|       | E     |      |       |       |       |       | 0,192 | 0,220 | 0,243 | 0,338 | 0,382 | 0,246 | 0,228 | 0,233 | 0,240 | 0,432 | 0,687 | 0,385 |
|       | F     |      |       |       |       |       |       | 0,216 | 0,228 | 0,322 | 0,387 | 0,240 | 0,228 | 0,223 | 0,221 | 0,447 | 0,717 | 0,408 |
|       | G     |      |       |       |       |       |       |       | 0,231 | 0,300 | 0,351 | 0,208 | 0,219 | 0,207 | 0,231 | 0,412 | 0,706 | 0,361 |
|       | H     |      |       |       |       |       |       |       |       | 0,301 | 0,340 | 0,255 | 0,250 | 0,258 | 0,260 | 0,408 | 0,694 | 0,368 |
| 6ZQ5  | A     |      |       |       |       |       |       |       |       |       | 0,284 | 0,254 | 0,307 | 0,292 | 0,311 | 0,416 | 0,704 | 0,372 |
|       | B     |      |       |       |       |       |       |       |       |       |       | 0,318 | 0,363 | 0,378 | 0,380 | 0,468 | 0,674 | 0,377 |
| 6ZQ6  | A     |      |       |       |       |       |       |       |       |       |       |       | 0,211 | 0,182 | 0,210 | 0,401 | 0,707 | 0,345 |
|       | B     |      |       |       |       |       |       |       |       |       |       |       |       | 0,185 | 0,186 | 0,427 | 0,691 | 0,394 |
|       | C     |      |       |       |       |       |       |       |       |       |       |       |       |       | 0,149 | 0,421 | 0,701 | 0,388 |
|       | D     |      |       |       |       |       |       |       |       |       |       |       |       |       |       | 0,447 | 0,683 | 0,405 |
| 6ZQ7  | A     |      |       |       |       |       |       |       |       |       |       |       |       |       |       |       | 0,766 | 0,431 |
| 6ZQ8  | A     |      |       |       |       |       |       |       |       |       |       |       |       |       |       |       |       | 0,692 |
|       | B     |      |       |       |       |       |       |       |       |       |       |       |       |       |       |       |       |       |

**C**

| Model | Chain | 6ZQ4 |       |       |       |       |       |       |       | 6ZQ5  |       | 6ZQ6  |       |       |       | 6ZQ7  | 6ZQ8  |       |
|-------|-------|------|-------|-------|-------|-------|-------|-------|-------|-------|-------|-------|-------|-------|-------|-------|-------|-------|
|       |       | A    | B     | C     | D     | E     | F     | G     | H     | A     | B     | A     | B     | C     | D     | A     | A     | B     |
| 6ZQ4  | A     |      | 0,257 | 0,258 | 0,222 | 0,191 | 0,229 | 0,173 | 0,192 | 0,203 | 0,317 | 0,351 | 0,357 | 0,300 | 0,304 | 0,530 | 0,998 | 0,460 |
|       | B     |      |       | 0,350 | 0,296 | 0,251 | 0,156 | 0,258 | 0,241 | 0,315 | 0,347 | 0,366 | 0,378 | 0,255 | 0,240 | 0,460 | 0,879 | 0,341 |
|       | C     |      |       |       | 0,179 | 0,207 | 0,276 | 0,184 | 0,376 | 0,275 | 0,469 | 0,287 | 0,193 | 0,294 | 0,307 | 0,684 | 1,123 | 0,443 |
|       | D     |      |       |       |       | 0,120 | 0,207 | 0,183 | 0,317 | 0,244 | 0,393 | 0,318 | 0,261 | 0,291 | 0,299 | 0,625 | 1,059 | 0,448 |
|       | E     |      |       |       |       |       | 0,176 | 0,167 | 0,275 | 0,214 | 0,346 | 0,328 | 0,287 | 0,283 | 0,287 | 0,588 | 1,013 | 0,420 |
|       | F     |      |       |       |       |       |       | 0,201 | 0,252 | 0,217 | 0,330 | 0,326 | 0,311 | 0,232 | 0,230 | 0,514 | 0,916 | 0,344 |
|       | G     |      |       |       |       |       |       |       | 0,251 | 0,209 | 0,354 | 0,298 | 0,274 | 0,267 | 0,281 | 0,578 | 1,009 | 0,406 |
|       | H     |      |       |       |       |       |       |       |       | 0,273 | 0,269 | 0,388 | 0,442 | 0,332 | 0,337 | 0,448 | 0,883 | 0,462 |
| 6ZQ5  | A     |      |       |       |       |       |       |       |       |       | 0,283 | 0,366 | 0,352 | 0,340 | 0,351 | 0,586 | 0,989 | 0,460 |
|       | B     |      |       |       |       |       |       |       |       |       |       | 0,477 | 0,520 | 0,427 | 0,436 | 0,482 | 0,831 | 0,503 |
| 6ZQ6  | A     |      |       |       |       |       |       |       |       |       |       |       | 0,245 | 0,257 | 0,268 | 0,605 | 1,034 | 0,418 |
|       | B     |      |       |       |       |       |       |       |       |       |       |       |       | 0,276 | 0,280 | 0,693 | 1,112 | 0,407 |
|       | C     |      |       |       |       |       |       |       |       |       |       |       |       |       | 0,150 | 0,484 | 0,943 | 0,314 |
|       | D     |      |       |       |       |       |       |       |       |       |       |       |       |       |       | 0,496 | 0,952 | 0,347 |
| 6ZQ7  | A     |      |       |       |       |       |       |       |       |       |       |       |       |       |       |       | 0,714 | 0,555 |
| 6ZQ8  | A     |      |       |       |       |       |       |       |       |       |       |       |       |       |       |       |       | 0,878 |
|       | B     |      |       |       |       |       |       |       |       |       |       |       |       |       |       |       |       |       |

RMSD [Å]

0 2
